# Supplementary material for: Evaluation and Characterization of Curcumin-β-Cyclodextrin and Cyclodextrin-Based Nanosponge Inclusion Complexation
Source: MDPI journal article supplement (doi:10.3390/polym13234073), 2021-11-24
Supplement: s1 [file s1]

## Supplementary Materials:

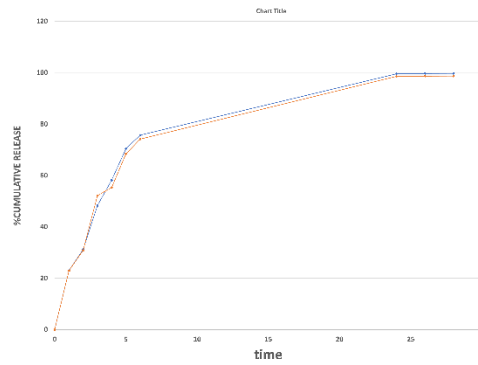

**Figure S1.** In vitro release profile of curcumin- $\beta$ -cyclodextrin complex compared to curcumin-loaded nanosponge.

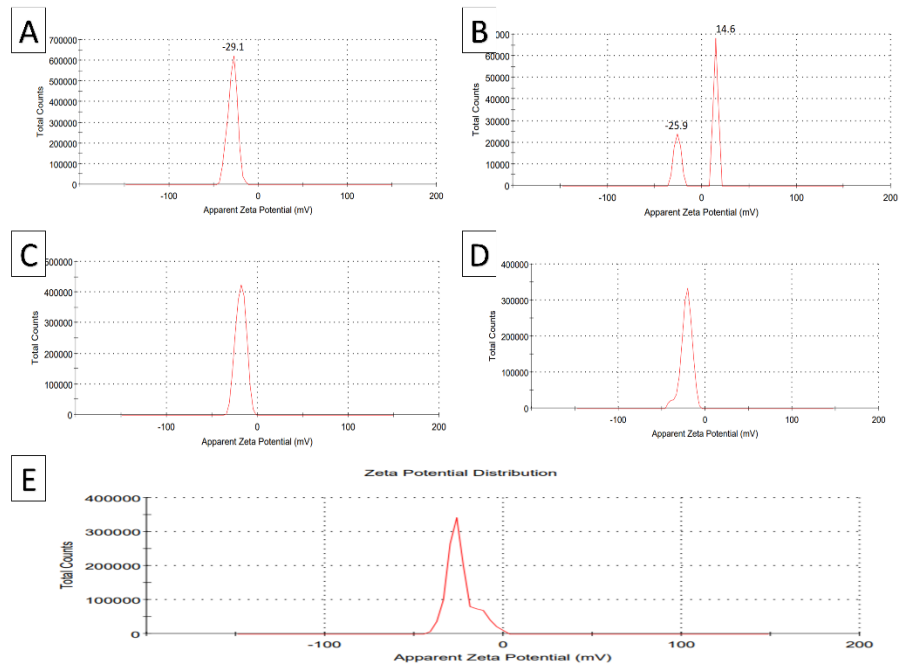

**Figure S2.** Zeta potentials of (A) raw  $\beta$ -cyclodextrin, (B) curcumin- $\beta$ -cyclodextrin complex, (C) plain NS4, (D) curcumin-loaded NS4, and (E) raw curcumin.
